# Supplementary material for: A Metal Coordination-Based Supramolecular Elastomer with Shape Memory-Assisted Self-Healing Effect
Source: MDPI journal article supplement (doi:10.3390/polym14224879), 2022-11-12
Supplement: s1 [file s1]

## Supporting Information

# A Metal Coordination-based Supramolecular Elastomer with Shape Memory-assisted Self-healing Effect

Fang Xie<sup>1†</sup>, Zhongxin Ping<sup>2†</sup>, Wanting Xu<sup>1</sup>, Fenghua Zhang<sup>2</sup>, Yuzhen Dong<sup>1</sup>, Lianjie Li<sup>1</sup>, Chengsen Zhang<sup>3</sup>, and Xiaobo Gong<sup>3\*</sup>

<sup>1</sup> School of Materials Science and Engineering, Harbin Institute of Technology at Weihai, Weihai 264209, China

<sup>2</sup> National key laboratory of science and technology on advanced composites in special environments, Harbin Institute of Technology, Harbin 150080, P. R. China

<sup>3</sup> School of Naval Architecture and Ocean Engineering, Harbin Institute of Technology at Weihai, Weihai 264209, China

\*Author to whom correspondence should be addressed.

†These authors contributed equally to this work.

## Additional Results:

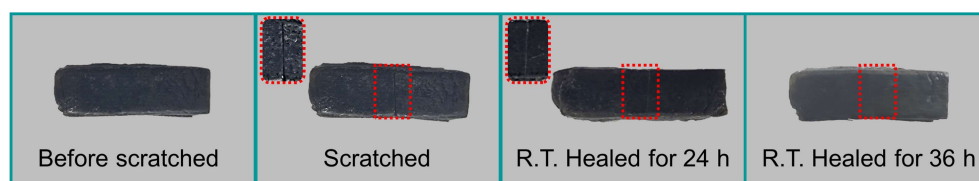

**Figure S1. Self-healing effect occurred at room temperature (R.T.).**

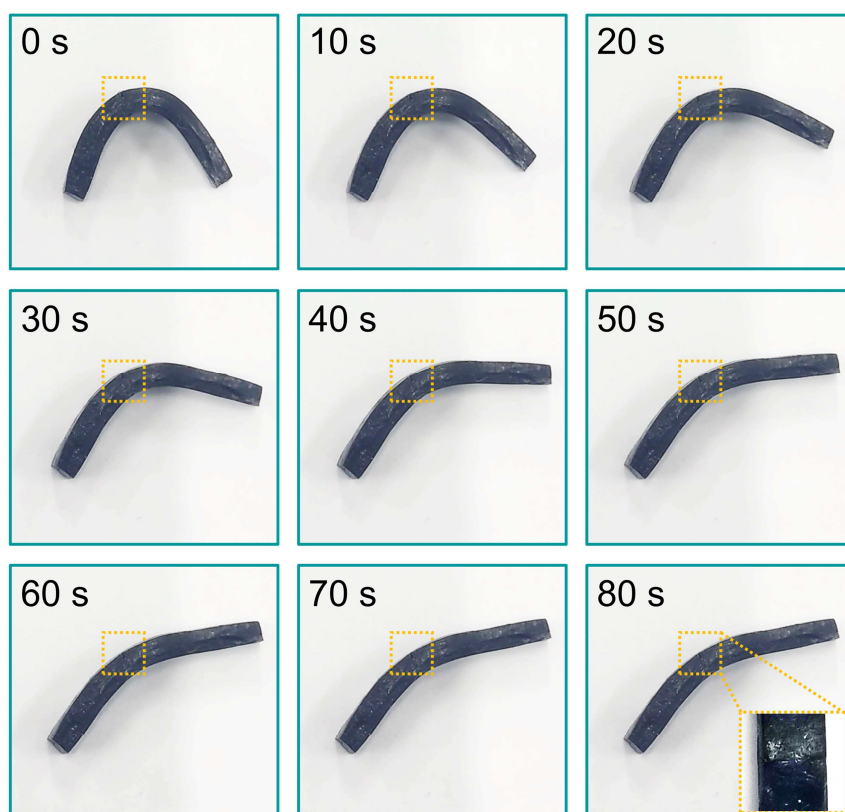

Figure S2. Self-healing effect occurred at room temperature (R.T.).
